# Supplementary material for: Seroprevalence of Getah virus in Pigs in Eastern China Determined with a Recombinant E2 Protein-Based Indirect ELISA
Source: MDPI journal article supplement (doi:10.3390/v14102173), 2022-09-30
Supplement: s1 [file s1]

## Supplementary Materials

**Table S1.** Identification of negative and positive serum for GETV.

| Sample    | VN     | IFA | ELISA | qRT-PCR |
|-----------|--------|-----|-------|---------|
| GETV-P1*  | 1:320  | +   | 1.566 | +       |
| GETV-P2*  | 1:640  | +   | 1.632 | +       |
| GETV-P3*  | 1:320  | +   | 1.578 | +       |
| GETV-P4*  | 1:320  | +   | 1.501 | +       |
| GETV-P5*  | 1:640  | +   | 1.788 | +       |
| GETV-P6*  | 1:1280 | +   | 1.945 | +       |
| GETV-P7*  | 1:640  | +   | 1.600 | +       |
| GETV-P8*  | 1:320  | +   | 1.511 | +       |
| GETV-P9*  | 1:320  | +   | 1.536 | +       |
| GETV-P10* | 1:160  | +   | 1.254 | +       |
| GETV-N1*  | <1:5   | -   | 0.301 | -       |
| GETV-N2*  | <1:5   | -   | 0.222 | -       |
| GETV-N3*  | <1:5   | -   | 0.125 | -       |
| GETV-N4*  | <1:5   | -   | 0.241 | -       |
| GETV-N5*  | <1:5   | -   | 0.114 | -       |
| GETV-N6*  | <1:5   | -   | 0.155 | -       |
| GETV-N7*  | <1:5   | -   | 0.144 | -       |
| GETV-N8*  | <1:5   | -   | 0.174 | -       |
| GETV-N9*  | <1:5   | -   | 0.134 | -       |
| GETV-N10* | <1:5   | -   | 0.129 | -       |

“\*” means that sera is from naturally infected pig. “+”, positive; “-”, negative.

ELISA: “X” >0.344, positive; “X” <0.344, negative.

**Table S2.** Identification of negative and positive serum for JEV, PRRSV, CSFV, PEDV,

PRV.

| Sample  | VN     | IFA |
|---------|--------|-----|
| JE-P1   | 1:1280 | +   |
| JE-P2   | 1:640  | +   |
| JE-P3   | 1:320  | +   |
| JE-P4   | 1:320  | +   |
| JE-P5   | 1:160  | +   |
| PRRS-P1 | 1:160  | +   |
| PRRS-P2 | 1:160  | +   |
| PRRS-P3 | 1:320  | +   |
| PRRS-P4 | 1:320  | +   |
| PRRS-P5 | 1:640  | +   |
| CSF-P1  | 1:320  | +   |
| CSF-P2  | 1:640  | +   |
| CSF-P3  | 1:320  | +   |
| CSF-P4  | 1:320  | +   |
| CSF-P5  | 1:640  | +   |
| PED-P1  | 1:320  | +   |
| PED-P2  | 1:640  | +   |
| PED-P3  | 1:640  | +   |
| PED-P4  | 1:640  | +   |
| PED-P5  | 1:640  | +   |
| PR-P1   | 1:512  | +   |
| PR-P2   | 1:512  | +   |
| PR-P3   | 1:512  | +   |
| PR-P4   | 1:512  | +   |
| PR-P5   | 1:512  | +   |

“+”, positive; “-”, negative.
